# Supplementary material for: A low-temperature processed flower-like TiO2 array as an electron transport layer for high-performance perovskite solar cells
Source: Royal Society of Chemistry journal article supplement (doi:10.1039/c6ta00893c), 2016-01-01
Supplement: c6ta00893c1.pdf [file c6ta00893c1.pdf]

## Supporting Information

---

### **Low-temperature Processed Flower-like TiO<sub>2</sub> Array as Electron Transport Layer for High-performance Perovskite Solar Cells**

*Xiao Chen,<sup>a</sup> Li Juan Tang,<sup>a</sup> Shuang Yang,<sup>a</sup> Yu Hou<sup>\*,a</sup>, and Hua Gui Yang<sup>\*,a</sup>*

<sup>a</sup> Key Laboratory for Ultrafine Materials of Ministry of Education, School of Materials Science and Engineering, East China University of Science and Technology, 130 Meilong Road, Shanghai 200237, China.

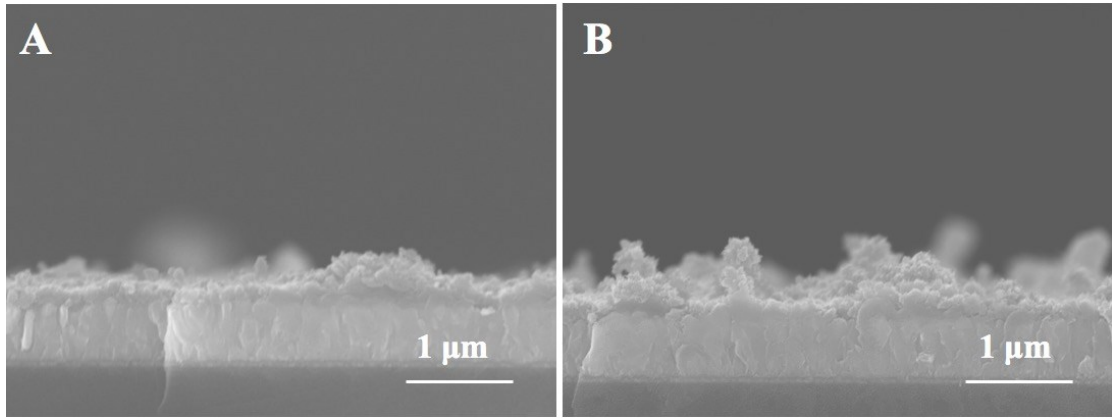

**Figure S1.** Cross-sectional SEM images of low-temperature CBD processed flower-like TiO<sub>2</sub> films with different reaction time of (A) 8 h and (B) 10 h.

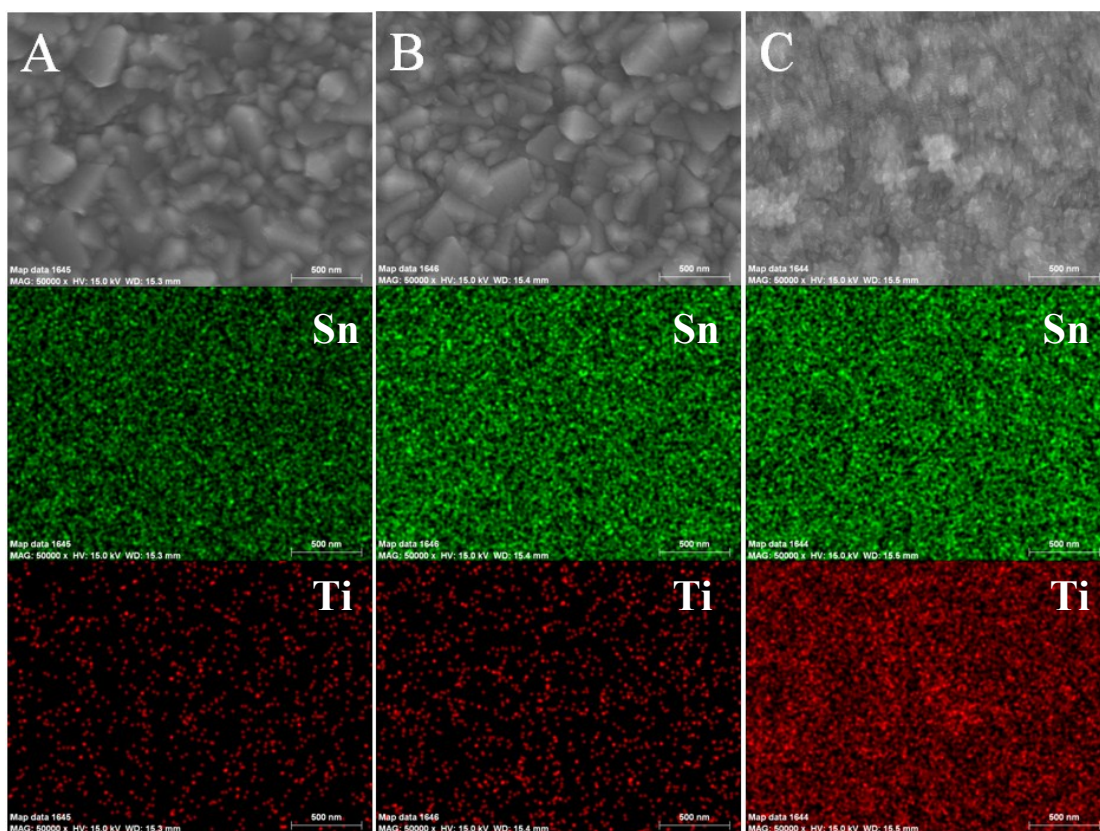

**Figure S2.** SEM images and corresponding elemental mapping of Sn and Ti from samples treated in  $\text{TiCl}_3$  for different time (A: 4h, B: 6h, C: 8h).

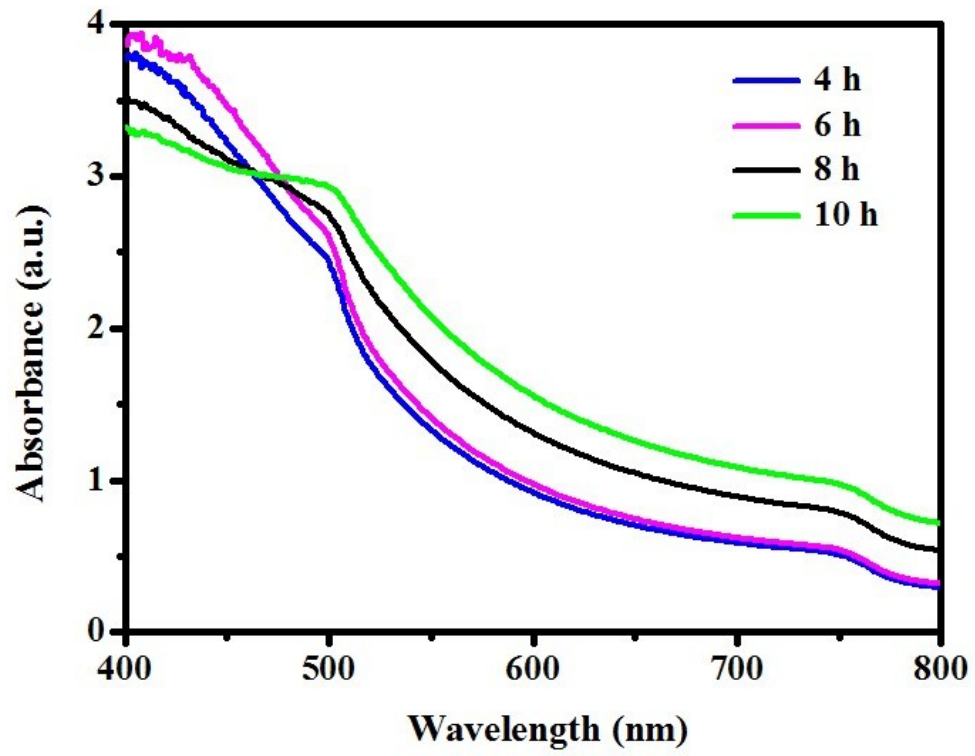

**Figure S3.** Absorption spectra of the perovskite-coated flower-like TiO<sub>2</sub> ETL films on FTO substrates.

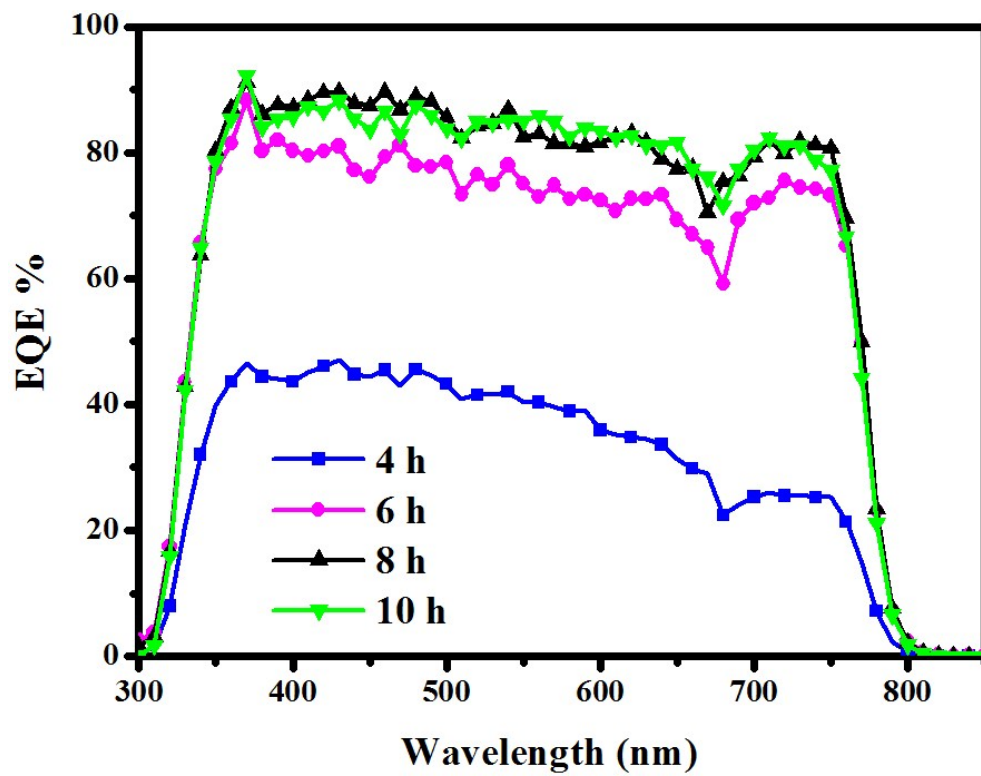

**Figure S4.** EQE spectra of different reaction time flower-like TiO<sub>2</sub> ETLs based perovskite solar cells.

**Table S1.** Photovoltaic parameters of perovskite solar cells with different reaction time ETLs, measured at a simulated AM 1.5 G solar irradiation.

| <i>Reaction time (h)</i> | $J_{sc}$ (mA cm <sup>-2</sup> ) | $V_{oc}$ (mV) | <i>FF</i> | $\eta$ (%) |
|--------------------------|---------------------------------|---------------|-----------|------------|
| 4                        | 9.52                            | 907.13        | 0.51      | 4.42       |
| 6                        | 19.58                           | 958.96        | 0.62      | 11.68      |
| 8                        | 21.18                           | 972.27        | 0.69      | 14.19      |
| 10                       | 21.28                           | 973.86        | 0.57      | 11.84      |

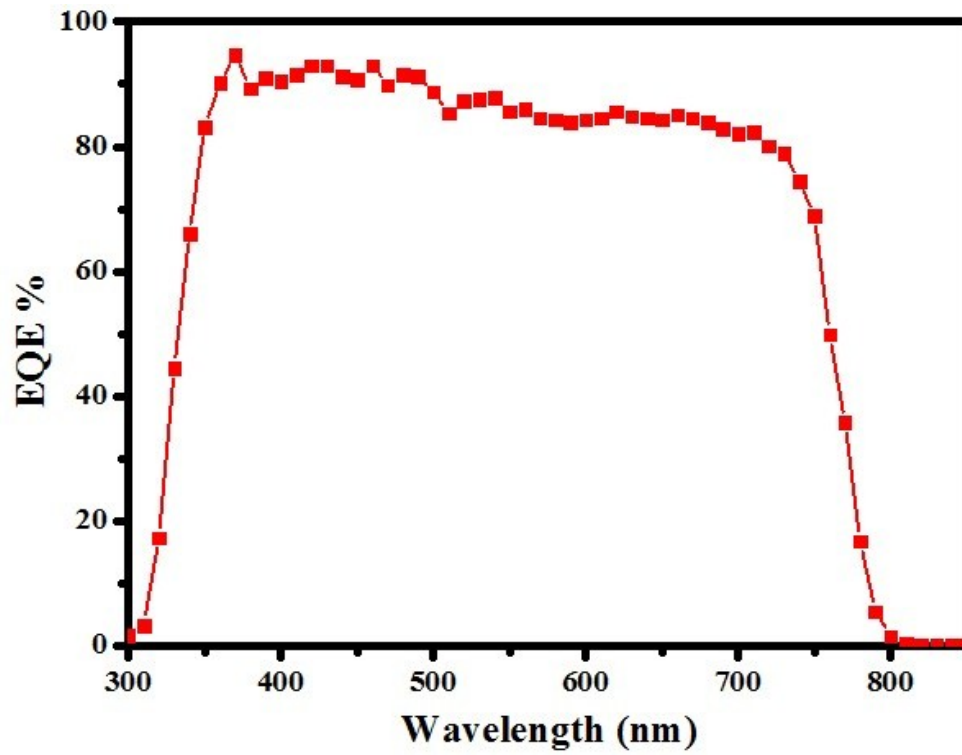

**Figure S5.** EQE spectrum of the best performing flower-like TiO<sub>2</sub> ETL based perovskite solar cell.

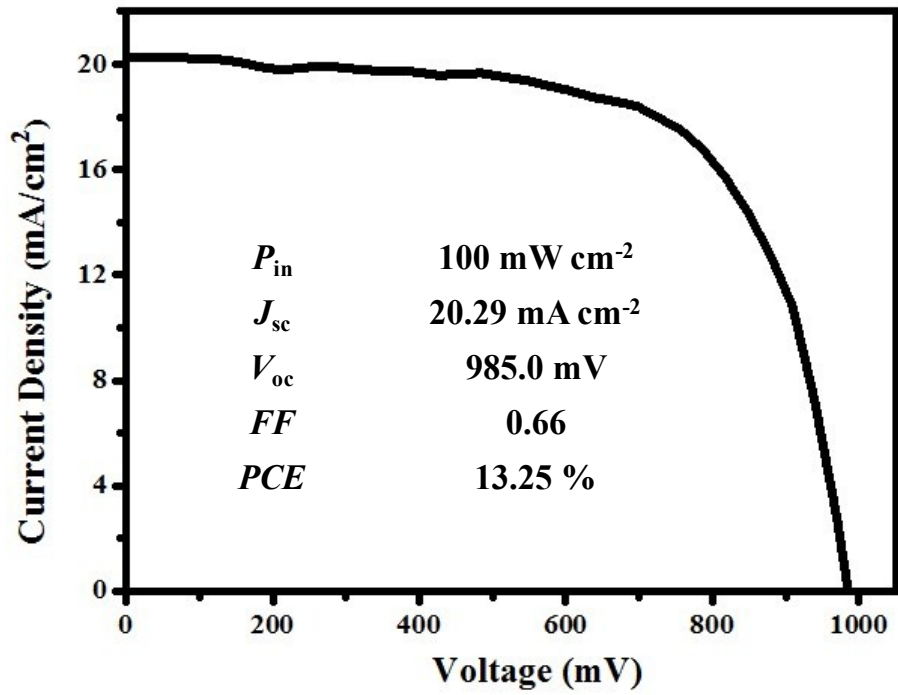

**Figure S6.**  $J$ - $V$  curves for perovskite solar cells based on traditional mesoporous TiO<sub>2</sub> ETL measured under a simulated AM 1.5 G solar irradiation.



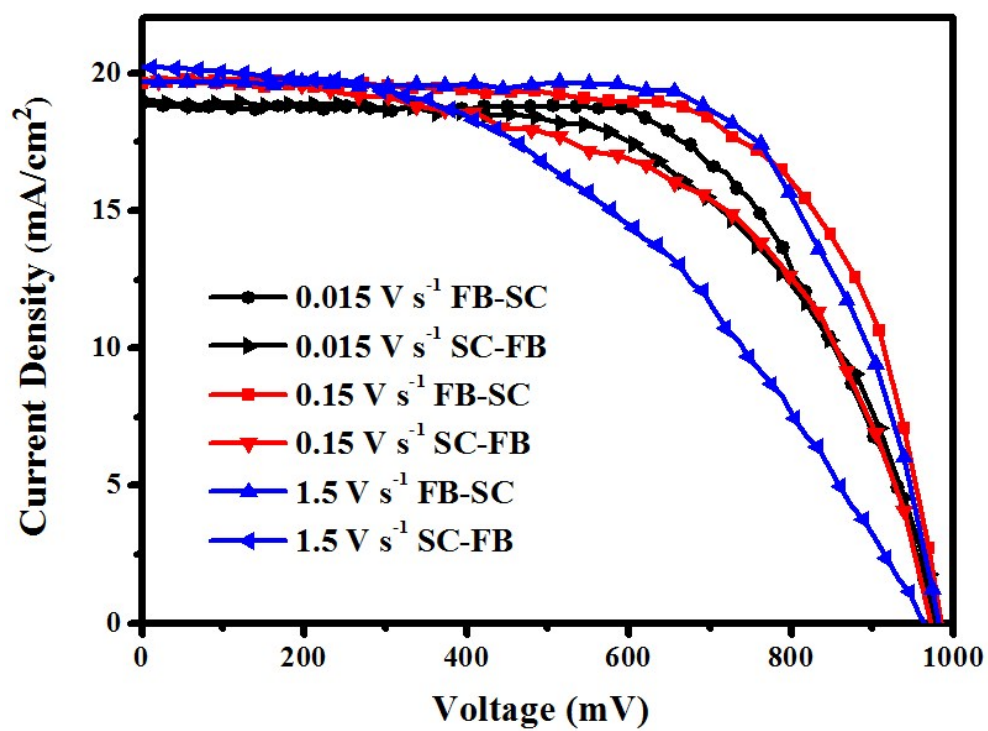

**Figure S7.** FB-SC and SC-FB  $J$ - $V$  curves measured with different sweeping rates for the perovskite solar cell based on traditional mesoporous TiO<sub>2</sub> ETL measured under a simulated AM 1.5 G solar irradiation.

**Table S2.** Photovoltaic parameters of flower-like TiO<sub>2</sub> ETL (8 h) based perovskite solar cells with different sweeping rates and directions, measured at a simulated AM 1.5 G solar irradiation.

| <i>Sweeping rate</i><br>( <i>V s<sup>-1</sup></i> ) | <i>Sweeping direction</i> | <i>J<sub>sc</sub></i> (mA cm <sup>-2</sup> ) | <i>V<sub>oc</sub></i> (mV) | <i>FF</i> | <i>η</i> (%) | Hysteresis index |
|-----------------------------------------------------|---------------------------|----------------------------------------------|----------------------------|-----------|--------------|------------------|
| 0.015                                               | FB-SC                     | 21.02                                        | 973.97                     | 0.67      | 13.73        | 0.084            |
|                                                     | SC-FB                     | 21.01                                        | 985.52                     | 0.59      | 12.13        |                  |
| 0.15                                                | FB-SC                     | 21.75                                        | 958.35                     | 0.67      | 14.03        | 0.191            |
|                                                     | SC-FB                     | 21.49                                        | 984.57                     | 0.52      | 11.08        |                  |
| 1.5                                                 | FB-SC                     | 21.85                                        | 977.31                     | 0.65      | 13.95        | 0.466            |
|                                                     | SC-FB                     | 21.33                                        | 998.94                     | 0.39      | 8.28         |                  |

**Table S3.** Photovoltaic parameters of mesoporous P25 ETL (300 nm thickness) based perovskite solar cells with different sweeping rates and directions, measured at a simulated AM 1.5 G solar irradiation.

| <i>Sweeping rate</i><br>( $V s^{-1}$ ) | <i>Sweeping direction</i> | $J_{sc}$ (mA cm <sup>-2</sup> ) | $V_{oc}$ (mV) | $FF$ | $\eta$ (%) | Hysteresis index |
|----------------------------------------|---------------------------|---------------------------------|---------------|------|------------|------------------|
| 0.015                                  | FB-SC                     | 18.77                           | 977.63        | 0.64 | 11.79      | 0.157            |
|                                        | SC-FB                     | 19.04                           | 983.90        | 0.58 | 10.79      |                  |
| 0.15                                   | FB-SC                     | 19.62                           | 985.41        | 0.67 | 13.05      | 0.297            |
|                                        | SC-FB                     | 19.76                           | 972.69        | 0.56 | 10.81      |                  |
| 1.5                                    | FB-SC                     | 19.68                           | 982.06        | 0.69 | 13.30      | 0.560            |
|                                        | SC-FB                     | 20.26                           | 964.66        | 0.45 | 8.72       |                  |
